# Supplementary material for: TNF-α regulates the proteolytic degradation of ST6Gal-1 and endothelial cell-cell junctions through upregulating expression of BACE1
Source: PubMed Central journal article supplement (PMC5238365; doi:10.1038/srep40256), 2017-01-16

**TNF- $\alpha$  regulates the proteolytic degradation of ST6Gal-1 and endothelial cell-cell junctions through upregulating expression of BACE1**

Xiao Deng<sup>1</sup>, Jun Zhang<sup>1</sup>, Yan Liu<sup>1</sup>, Linmu Chen<sup>1</sup>, Chao Yu<sup>1\*</sup>

<sup>1</sup>Institute of Life Science, Chongqing Medical University, Chongqing 400016, P. R. China

X.D. and J.Z. contributed equally to this study

\*Corresponding author: Prof. Chao Yu,

Email: yuchaom@163.com

Phone: (86) 23-68485589

Fax: (86) 23-68486294

Full address: Box #174, Institute of Life Sciences, Chongqing Medical University, No. 1 Yixueyuan Road, Yuzhong District, Chongqing 400016, P. R. China.

# Supplementary Figure 1

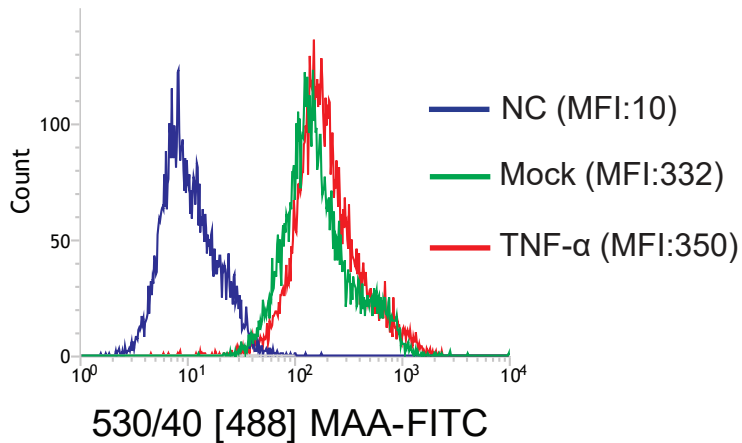

**Supplementary Fig. 1 Flow cytometry data for total protein  $\alpha$ -2, 3 sialylation levels in EA.hy926 cells treated with TNF- $\alpha$ .** EA.hy926 cells were treated with TNF- $\alpha$  (50 ng/ml) for 24 h and then incubated with MAA-FITC (2  $\mu$ g/ml) for 1 h at room temperature. After being washed three times in PBS, the cells were analyzed using a BD Influx Cell Sorter (BD Biosciences, USA). The graphs represent the relative results of three independent assays. MFI, mean fluorescence intensity. NC, EA.hy926 cells unstained with FITC-labeled SNA. Mock, EA.hy926 without treatment.

**A**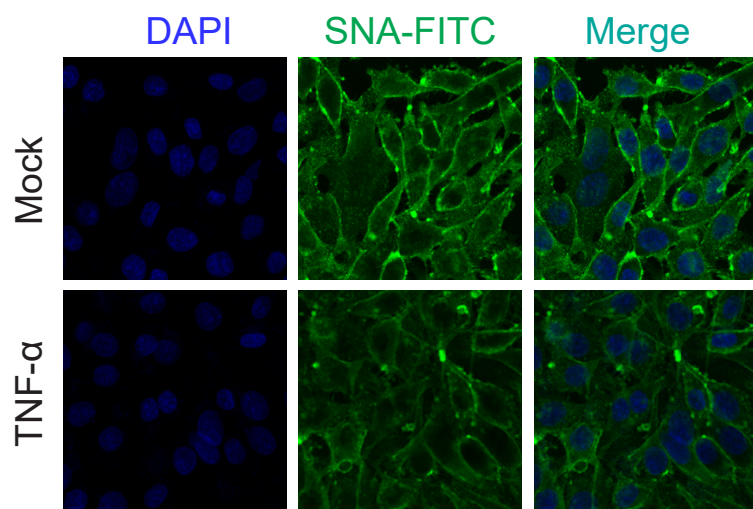**B**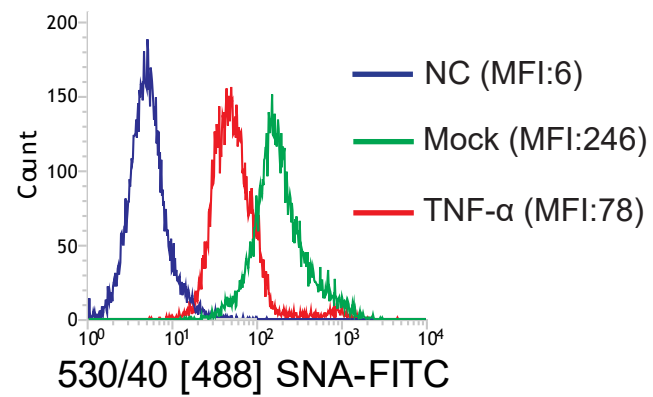**C**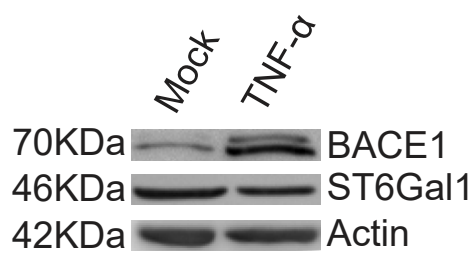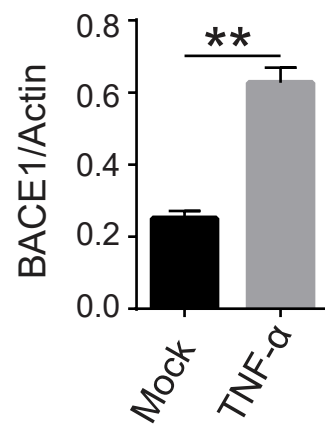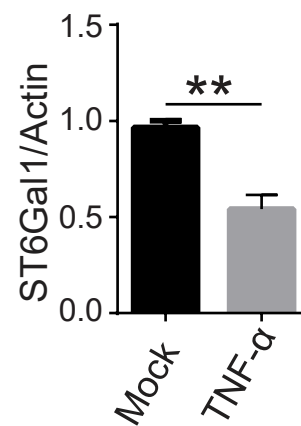

**Supplementary Fig. 2 TNF- $\alpha$  treatment decreases ST6Gal-I levels but upregulates BACE1 in primary HUVECs.** (A) Primary HUVECs were treated with TNF- $\alpha$  (50 ng/ml) for 24 h. After FITC-labeled SNA staining,  $\alpha$ 2, 6 sialylation expression was examined by confocal fluorescence microscopy. Mock, HUVECs without treatment. (B) Flow cytometry was then used to determine  $\alpha$ 2, 6 sialylation expression. The data are the mean $\pm$ SD of three independent assays. The MFI was quantified using BD FACS Software. NC, HUVECs unstained with FITC-labeled SNA. Mock, HUVECs without TNF- $\alpha$  treatment. (C) Western blotting was conducted to characterize ST6Gal-I and BACE1 levels in HUVECs after TNF- $\alpha$  treatment. The data are the mean $\pm$ SD of three independent assays (\*\* $p$ <0.01). ns, not significant.

Fig.2A

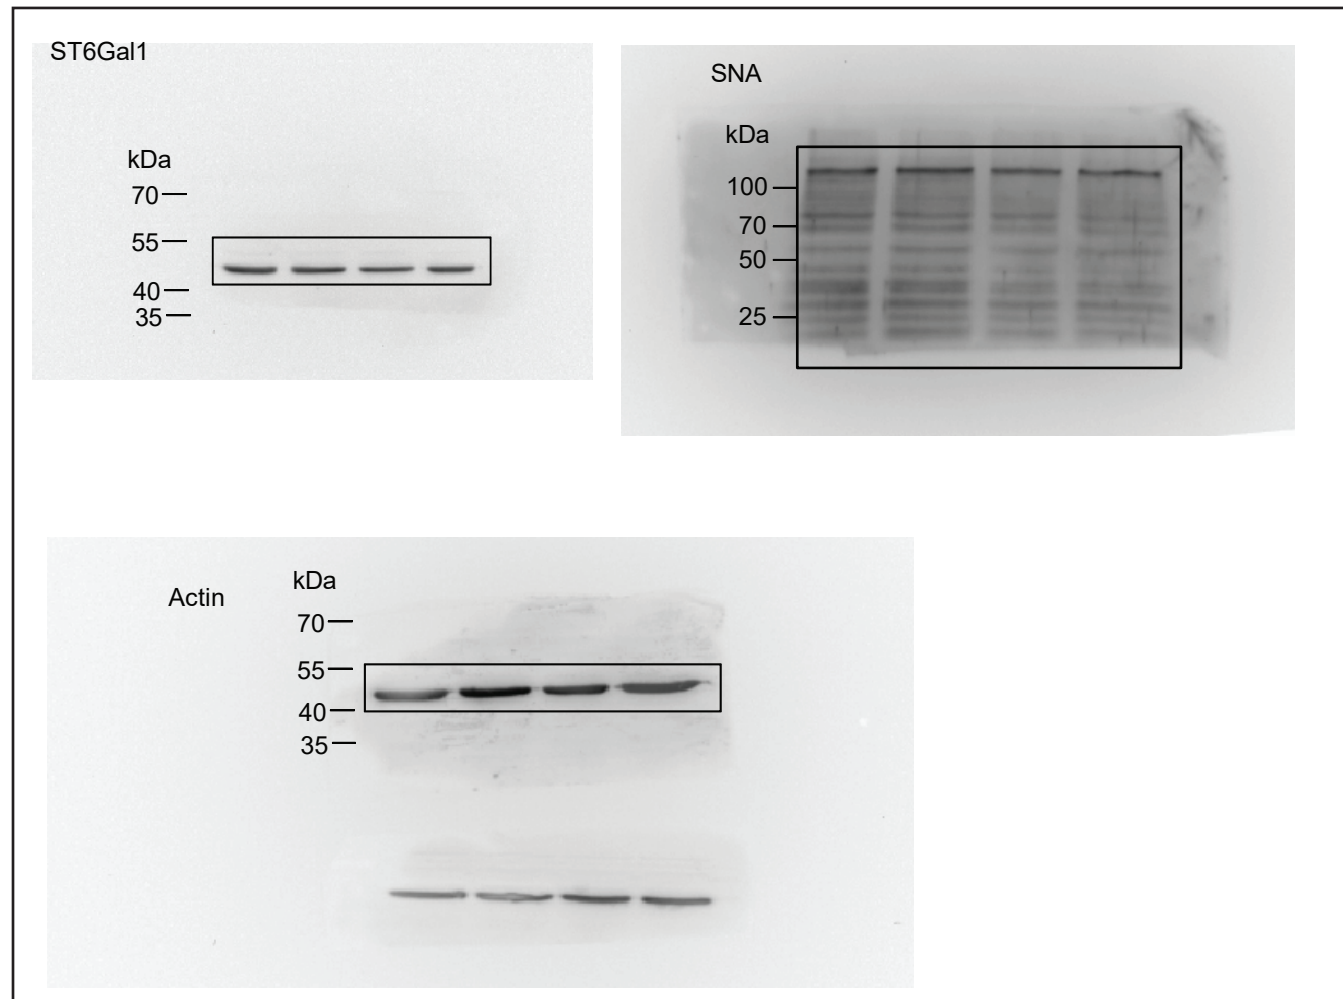

Fig.3A

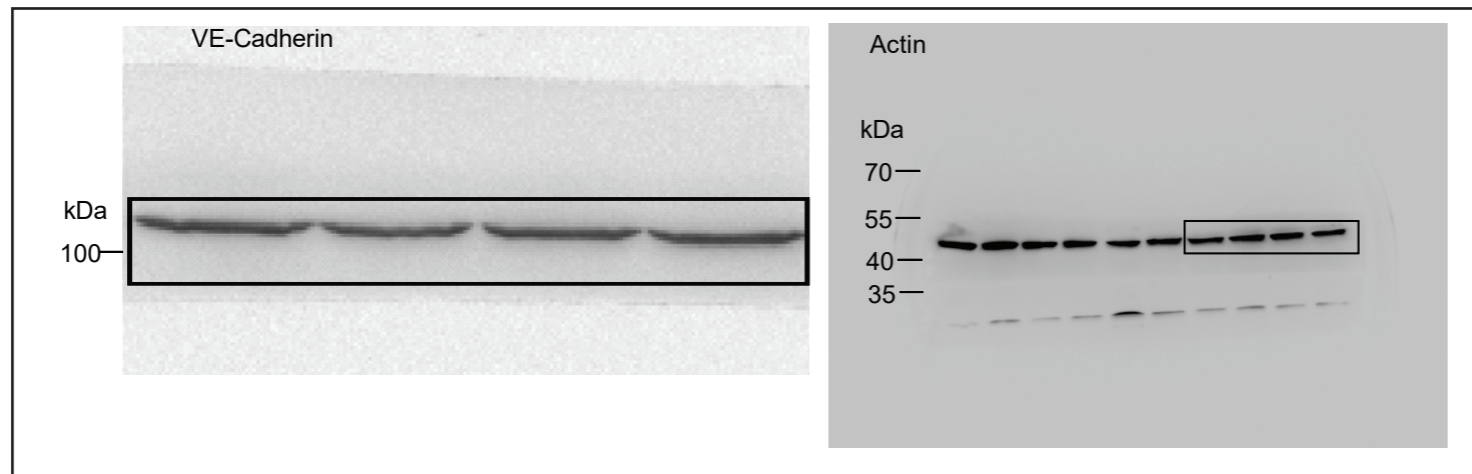

Fig.3B

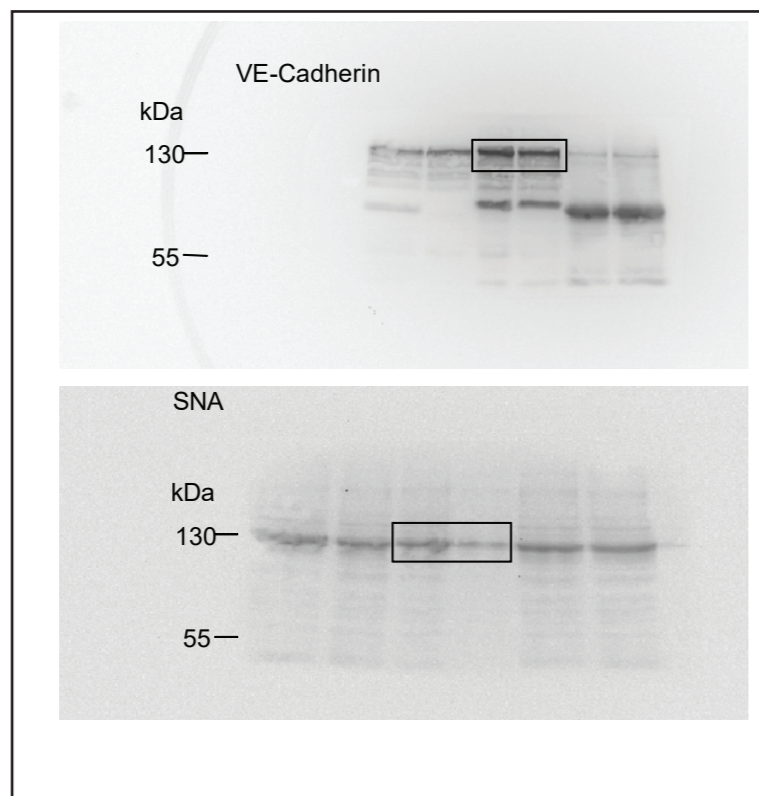

Fig.3C

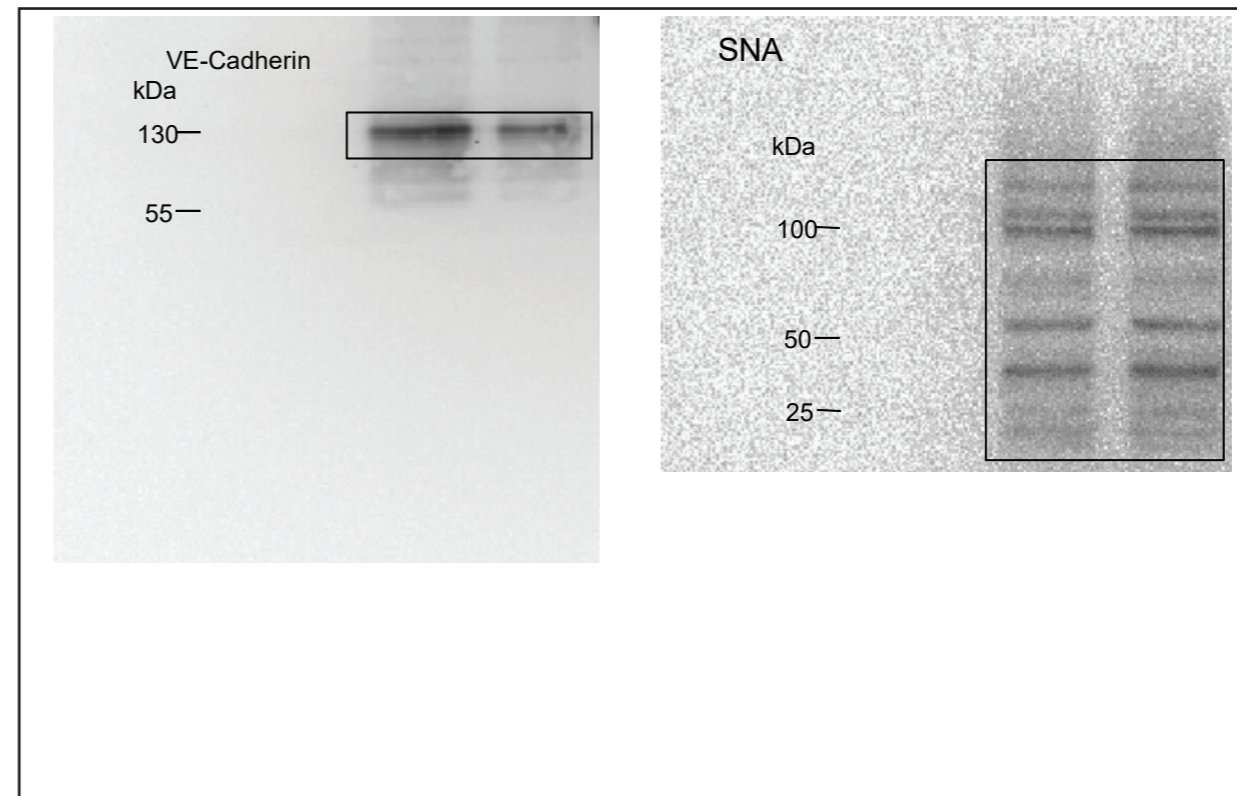

Fig.4A

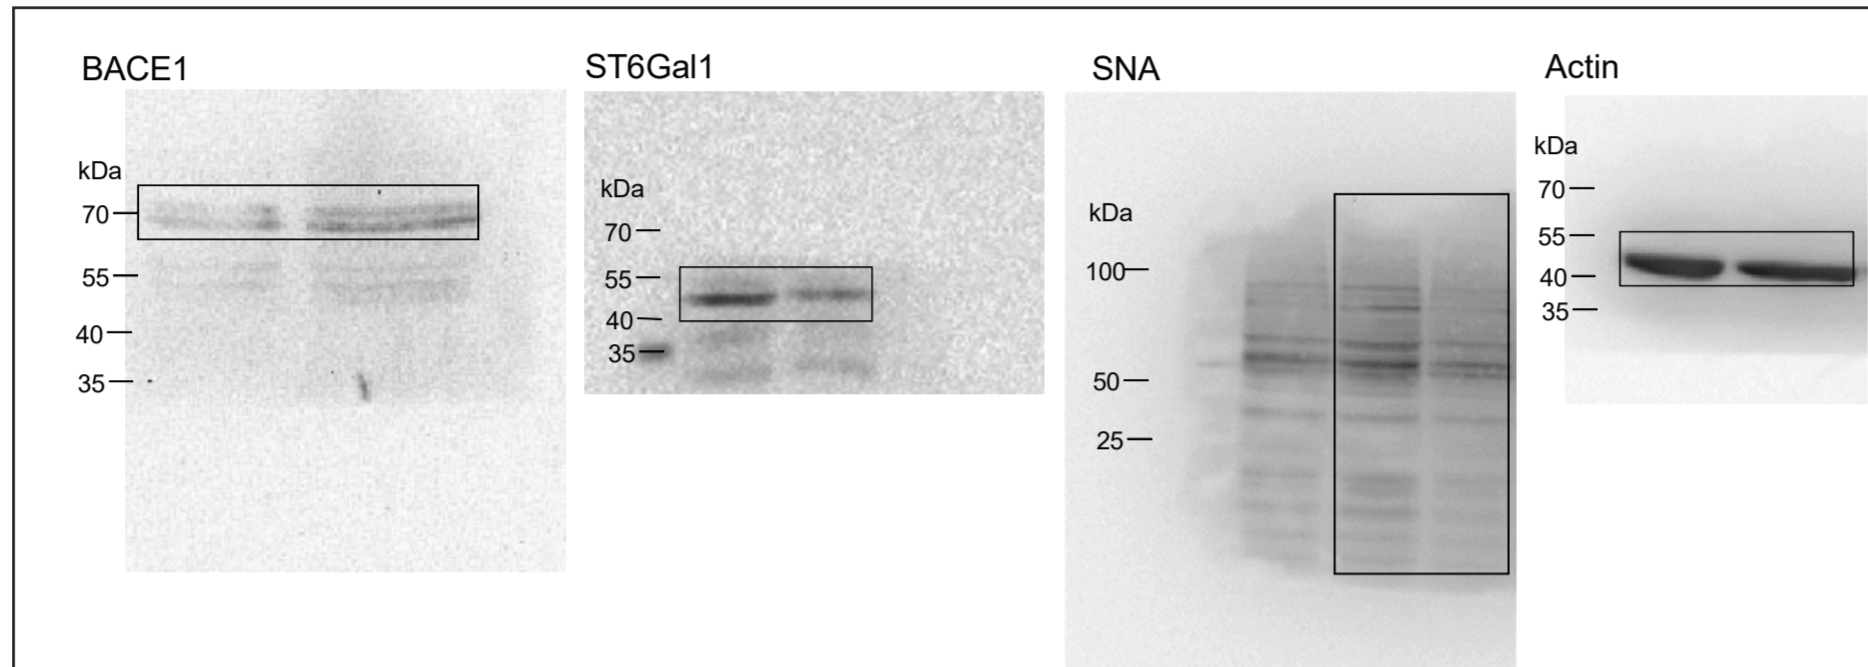

Fig.4B

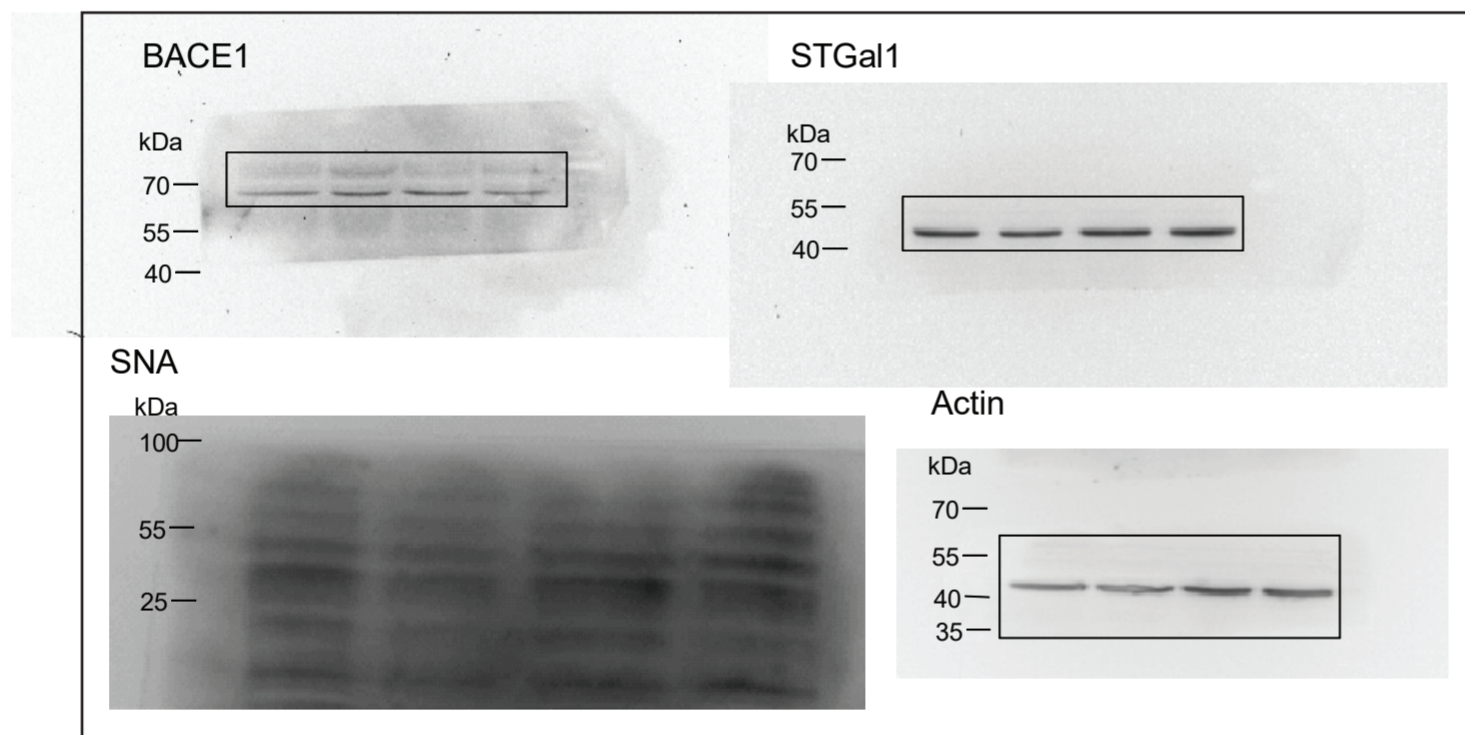

Fig.4D

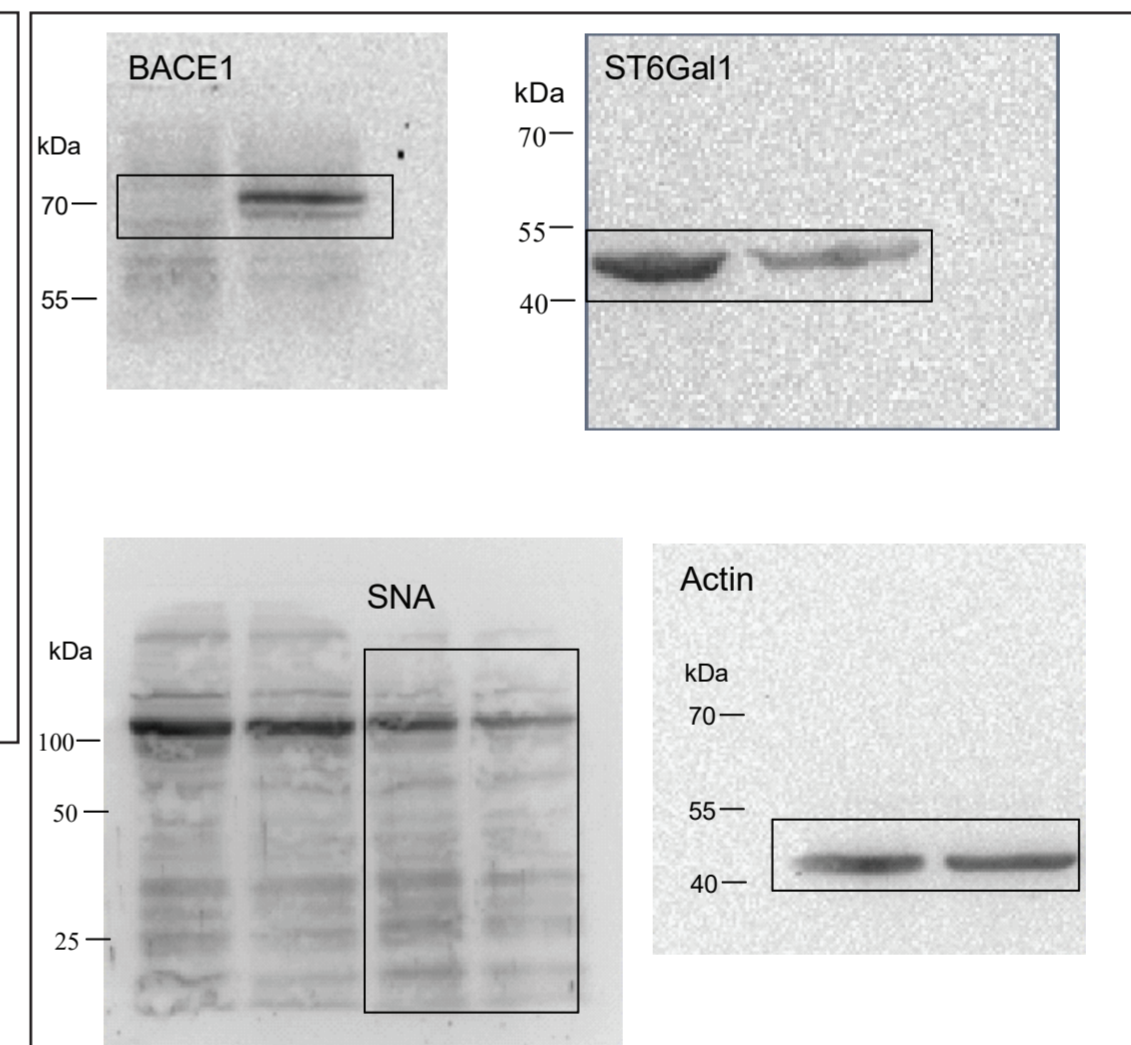

Fig.4F

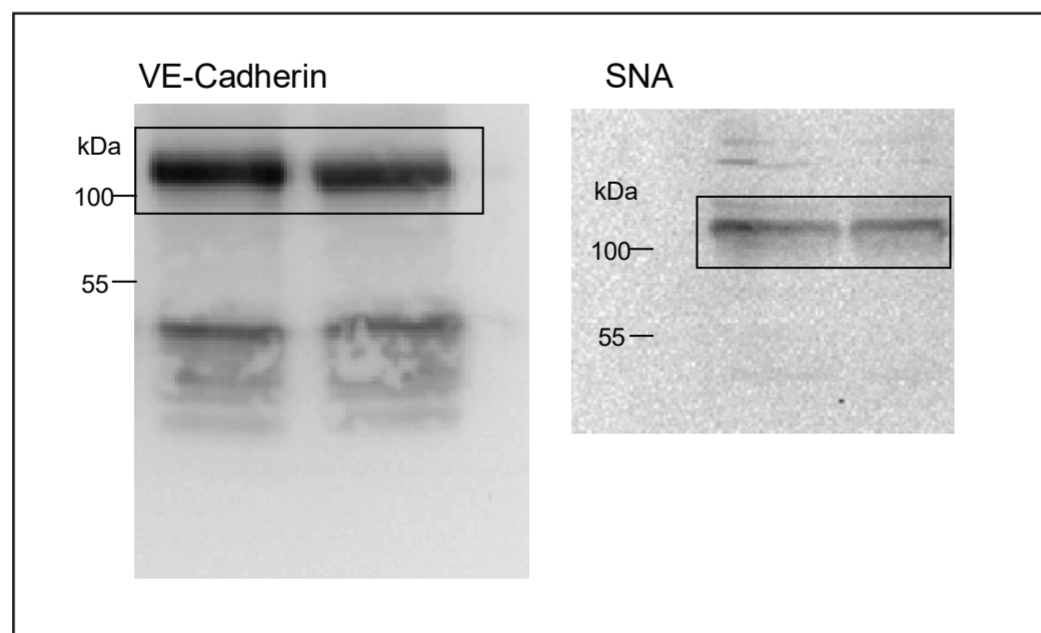



Fig.6A

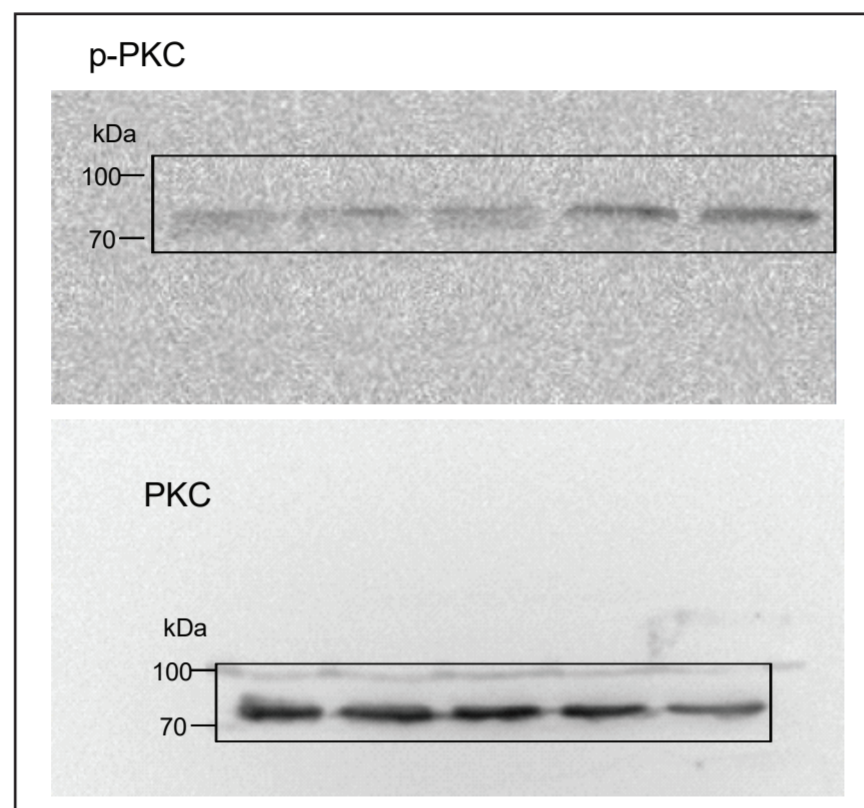

Fig.6B

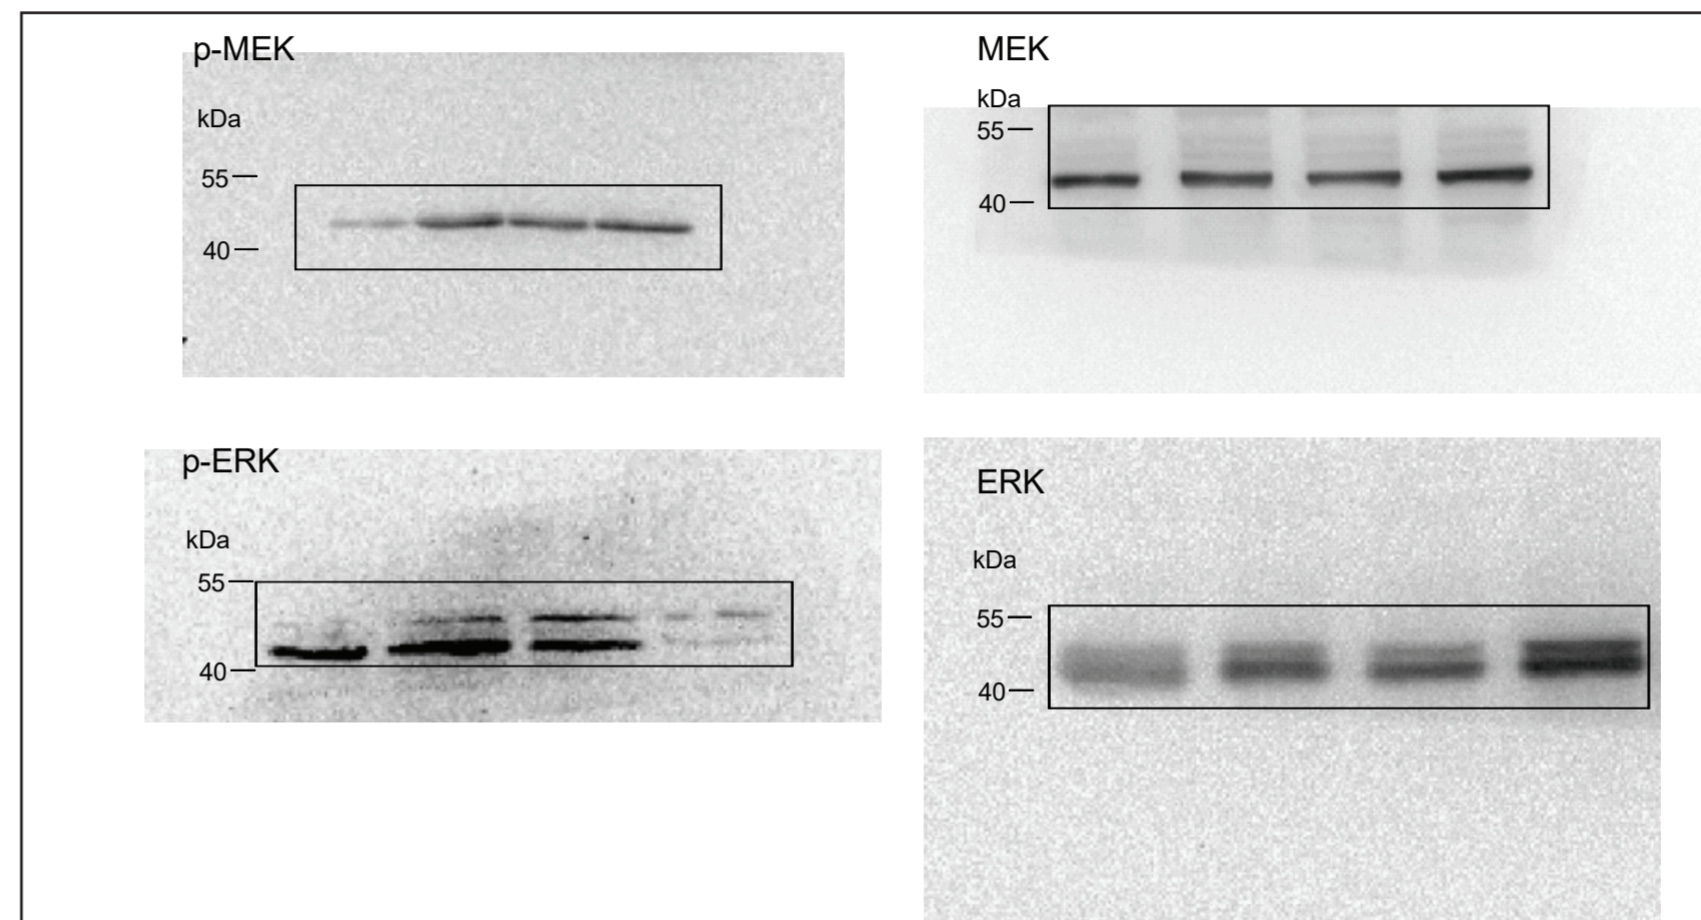

Fig.6C

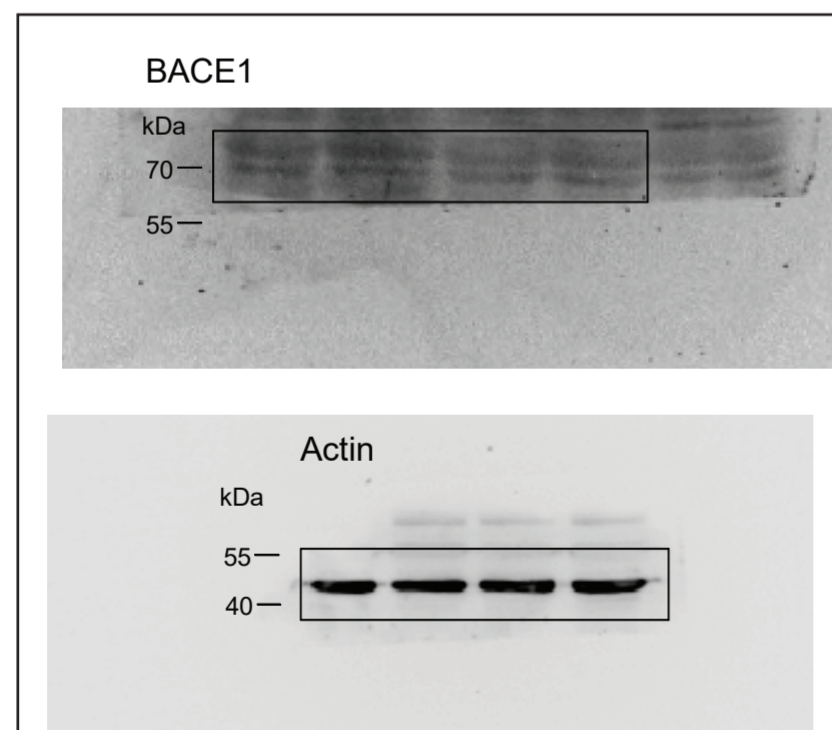

Fig.6D

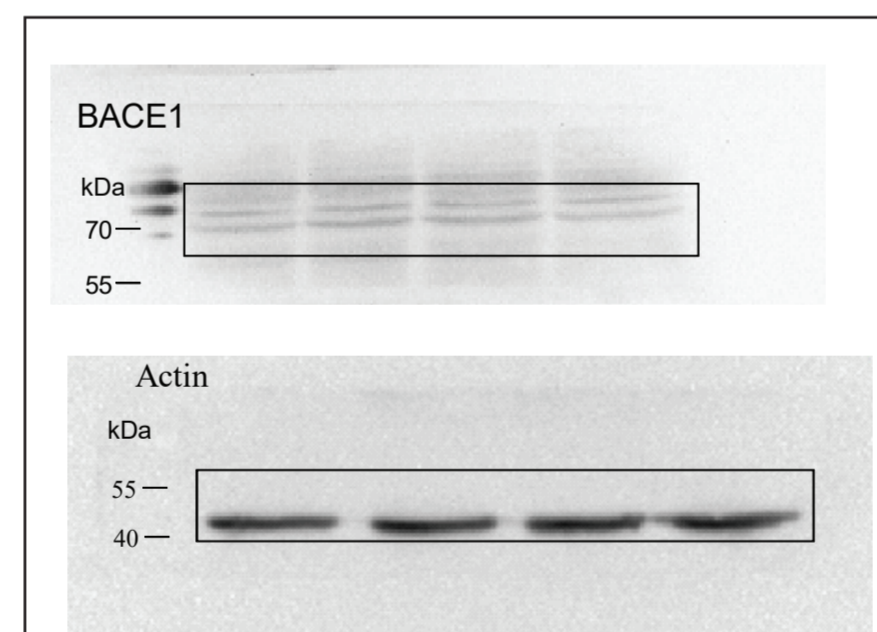

Supplement: srep40256-s1.pdf [file srep40256-s1.pdf]
